# Supplementary material for: Molecular engineered rhenium(i) carbonyl complexes to promote photoisomerization of coordinated stilbene-like ligands in the visible region
Source: Royal Society of Chemistry journal article supplement (doi:10.1039/c8dt02721h), 2018-01-01
Supplement: c8dt02721h1.pdf [file c8dt02721h1.pdf]

# Molecular Engineered Rhenium(I) Carbonyl Complexes to Promote Photoisomerization of Coordinated Stilbene-like Ligands in the Visible Region

Ronaldo C. Amaral<sup>1,2</sup> and Neyde Y. Murakami Iha<sup>1\*</sup>

1. Laboratory of Photochemistry and Energy Conversion, Departamento de Química Fundamental, Instituto de Química, Universidade de São Paulo – USP, Av. Prof. Lineu Prestes, 748, 05508-000, São Paulo, SP, Brazil. E-mail: neydeiha@iq.usp.br
2. Instituto Federal de Educação, Ciência e Tecnologia de São Paulo - IFSP, *campus* Sorocaba, R. Maria Cinto de Biaggi, 130, 18095-410, Sorocaba, SP, Brazil.

## Electronic Supplementary Information (ESI)

### 1. Experimental Section

#### 1.1. Molar absorptivity of *fac*-[Re(CO)<sub>3</sub>(*cis*-stpyR)]<sup>+</sup> complexes

The  $\varepsilon_{cis}(\lambda)$  were obtained using the ratio between the integrals of *trans* and *cis* <sup>1</sup>H NMR signals in irradiated solutions, Equation S1, as previously described.<sup>4</sup>

$$\varepsilon_{cis}(\lambda) = \varepsilon_{trans}(\lambda) \times \frac{(A_{irr}(\lambda) - A_{trans}(\lambda) \cdot \%_{trans}^{1H\ NMR})}{A_{trans}(\lambda) \cdot \%_{cis}^{1H\ NMR}}, \quad (S1)$$

in which  $\varepsilon_{trans}(\lambda)$  = molar absorptivity for the *trans*-isomer (L mol<sup>-1</sup> cm<sup>-1</sup>);  $\%_{trans}^{1H\ NMR}$  and  $\%_{cis}^{1H\ NMR}$  = percentages of *trans*- and *cis*-isomers in the irradiated solution obtained by the distinct integrals in the <sup>1</sup>H NMR spectrum;  $A_{trans}(\lambda)$  = absorbance of the *trans*-isomer solution before irradiation;  $A_{irr}(\lambda)$  = absorbance of the irradiated solution.

## 1.2. Apparent *trans-to-cis* photoisomerization quantum yields

Apparent *trans-to-cis* photoisomerization quantum yields ( $\Phi_{trans \rightarrow cis}^{app}$ ) were obtained following absorbance changes by Equation S2 (Table S2-S11 in the ESI); they are apparent, since both *trans*- and *cis*-isomers absorb in the same region.<sup>1,2,4-9</sup>

$$\Phi_{trans \rightarrow cis}^{app} = \frac{1}{I_0 \cdot t_{irr}} \times \frac{(A_{trans} - A_{irr}) \cdot N_A \cdot V_{irr}}{\epsilon_{trans} \cdot b}, \quad (S2)$$

where  $t_{irr}$  = irradiation time (s);  $I_0$  = light intensity (quanta s<sup>-1</sup>);  $b$  = optical path length of the irradiated cuvette (cm);  $V_{irr}$  = volume of the irradiated solution;  $N_A$  = Avogadro number.

## 1.3. True *trans-to-cis* photoisomerization quantum yields

True quantum yields ( $\Phi_{trans \rightarrow cis}^{true}$ ) were obtained by correcting  $\Phi_{trans \rightarrow cis}^{app}$  to the molar absorptivities of the *cis*-isomer ( $\epsilon_{cis}(\lambda)$  / L mol<sup>-1</sup> cm<sup>-1</sup>) using Equation S3 (Table S2-S11 in the ESI) and just named as  $\Phi_{trans \rightarrow cis}$  in this paper.<sup>2,4,6,10</sup>

$$\Phi_{trans \rightarrow cis}^{true} = \frac{1}{I_0 \cdot t_{irr}} \times \frac{(A_{irr} - A_{trans}) \cdot N_A \cdot V_{irr}}{(\epsilon_{cis} - \epsilon_{trans}) \cdot b} \quad (S3)$$

## 1.4. Reverse *cis-to-trans* photoisomerization quantum yields

Quantum yields for the reverse *cis-to-trans* photoreaction ( $\Phi_{cis \rightarrow trans}$ ) were obtained at 255 nm irradiation of the photostationary solution by using Equation S4 (Table S12-S13 in the ESI).<sup>10-13</sup>

$$\Phi_{cis \rightarrow trans} = \frac{1}{I_0 \cdot t_{irr}} \times \frac{(A_{PS} - A_{irr}) \cdot N_A \cdot V_{irr}}{(\epsilon_{cis} - \epsilon_{trans}) \cdot b}, \quad (S4)$$

in which  $A_{PS}$  = initial absorption of the photostationary solution.

## 2. NMR, IR and electronic spectra

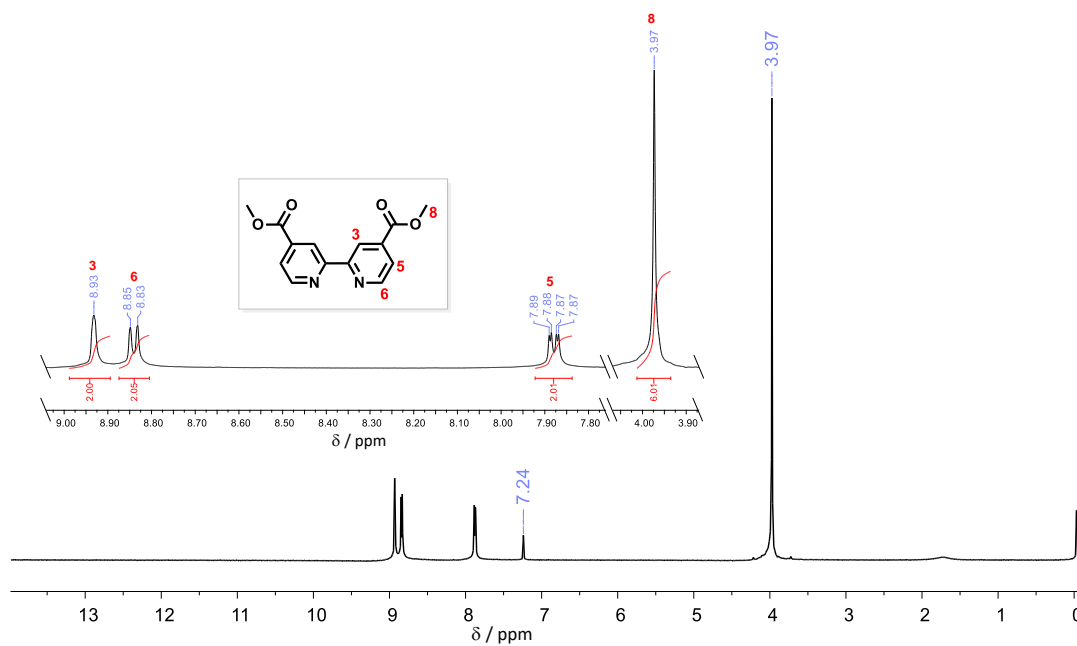

Figure S1. <sup>1</sup>H NMR spectrum (300 MHz) for dmcb in CD<sub>3</sub>Cl (T = 298 K).

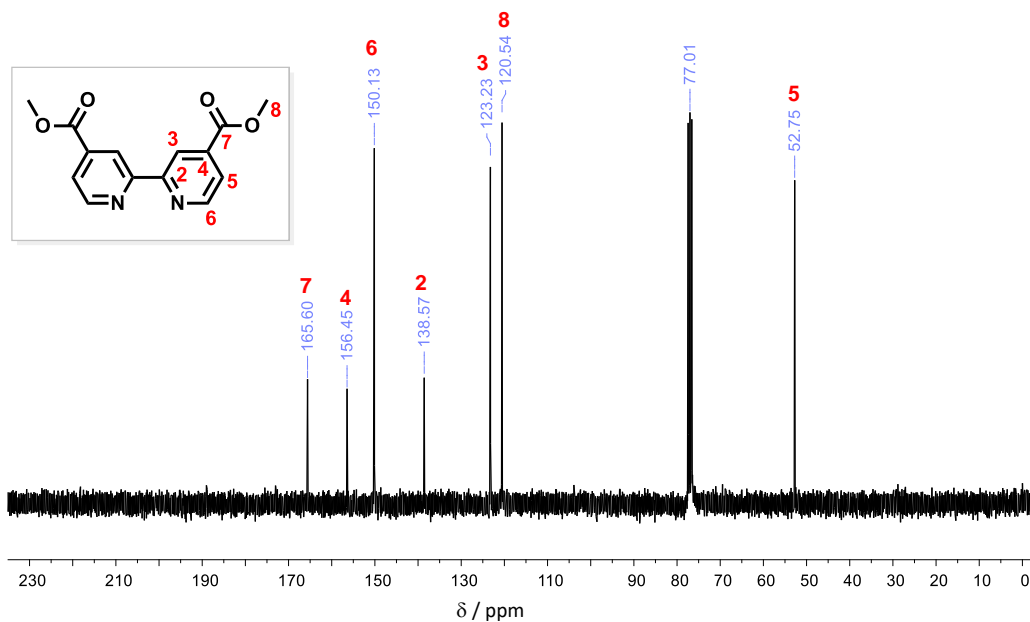

Figure S2. <sup>13</sup>C NMR spectrum (75 MHz) for dmcb in CD<sub>3</sub>Cl (T = 298 K).

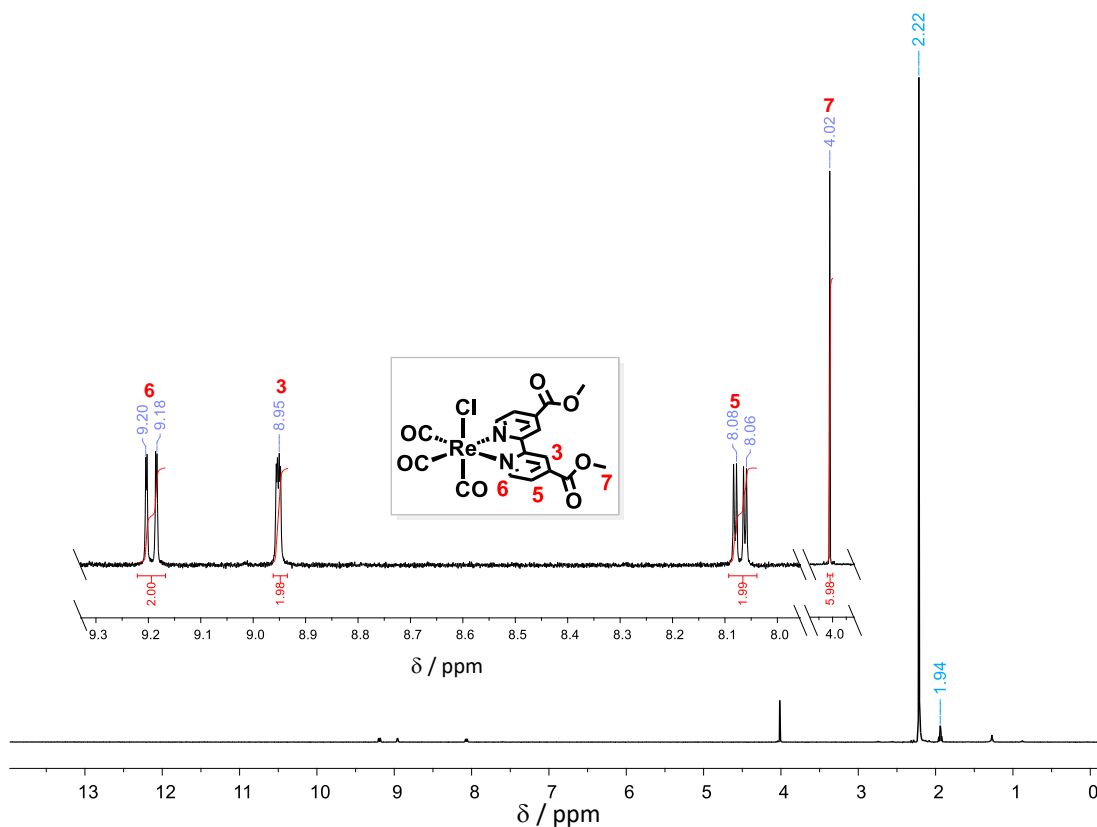

**Figure S3.**  $^1\text{H}$  NMR spectrum (300 MHz) for  $\text{fac-}[\text{Re}(\text{CO})_3(\text{dmc})\text{Cl}]$  in  $\text{CD}_3\text{CN}$  ( $T = 298\text{ K}$ ).

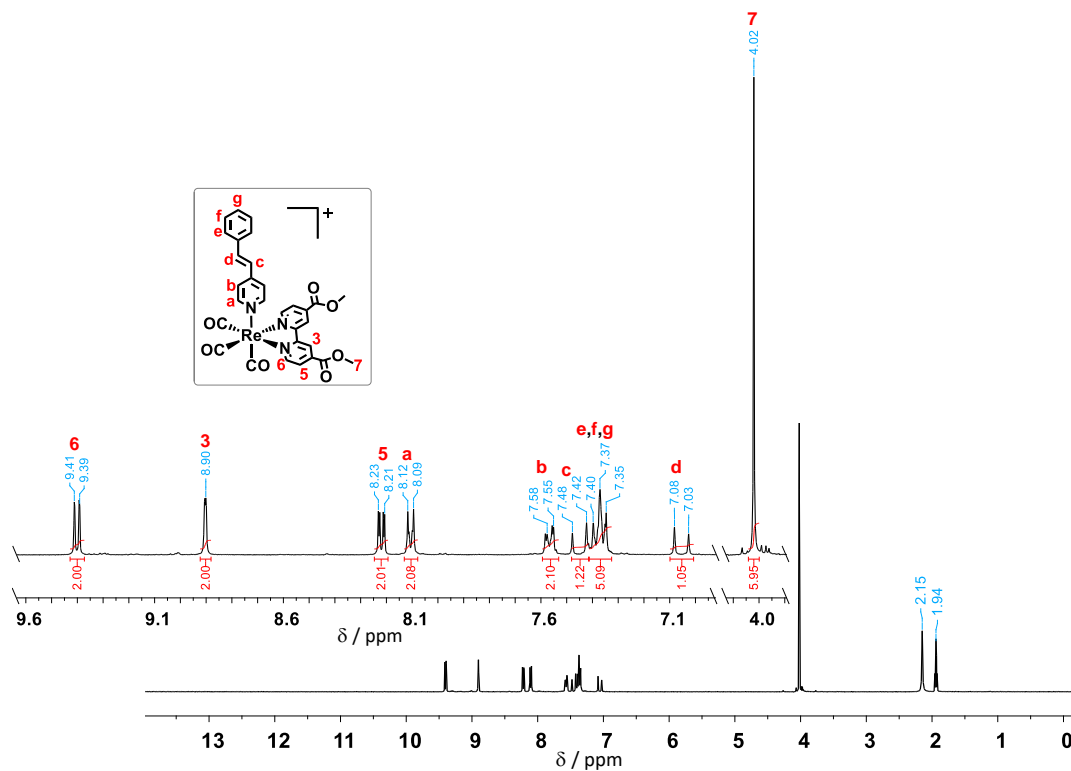

**Figure S4.**  $^1\text{H}$  NMR spectrum (300 MHz) for  $\text{fac-}[\text{Re}(\text{CO})_3(\text{dmc})(\text{trans-stpy})]\text{PF}_6$  in  $\text{CD}_3\text{CN}$  ( $T = 298\text{ K}$ ).

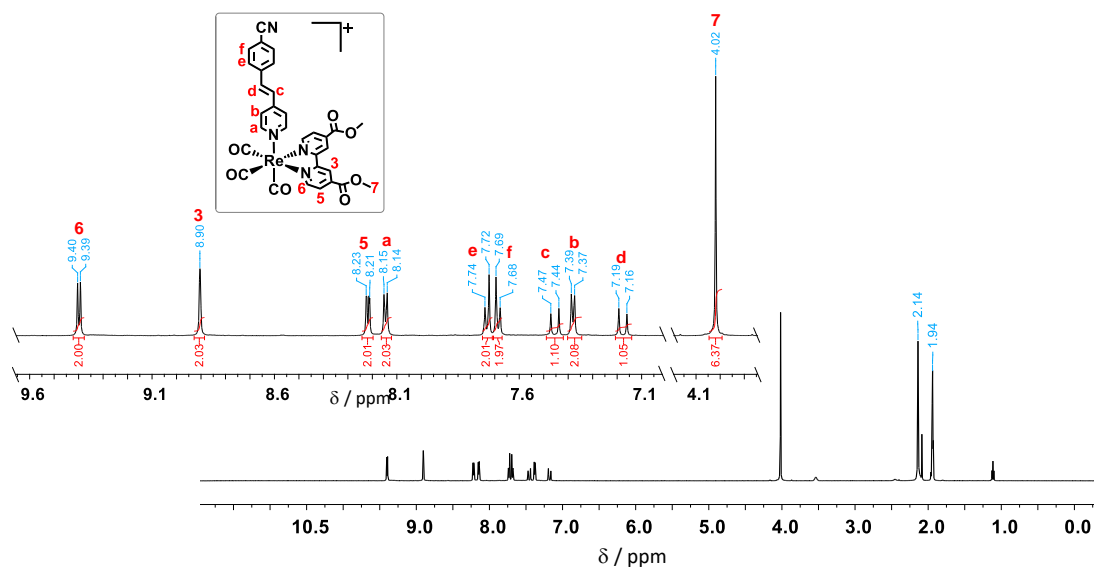

**Figure S5.**  $^1\text{H}$  NMR spectrum (500 MHz) for  $\text{fac-}[\text{Re}(\text{CO})_3(\text{dmbc})(\text{trans-stpyCN})]\text{PF}_6$  in  $\text{CD}_3\text{CN}$  ( $T = 298\text{ K}$ ).

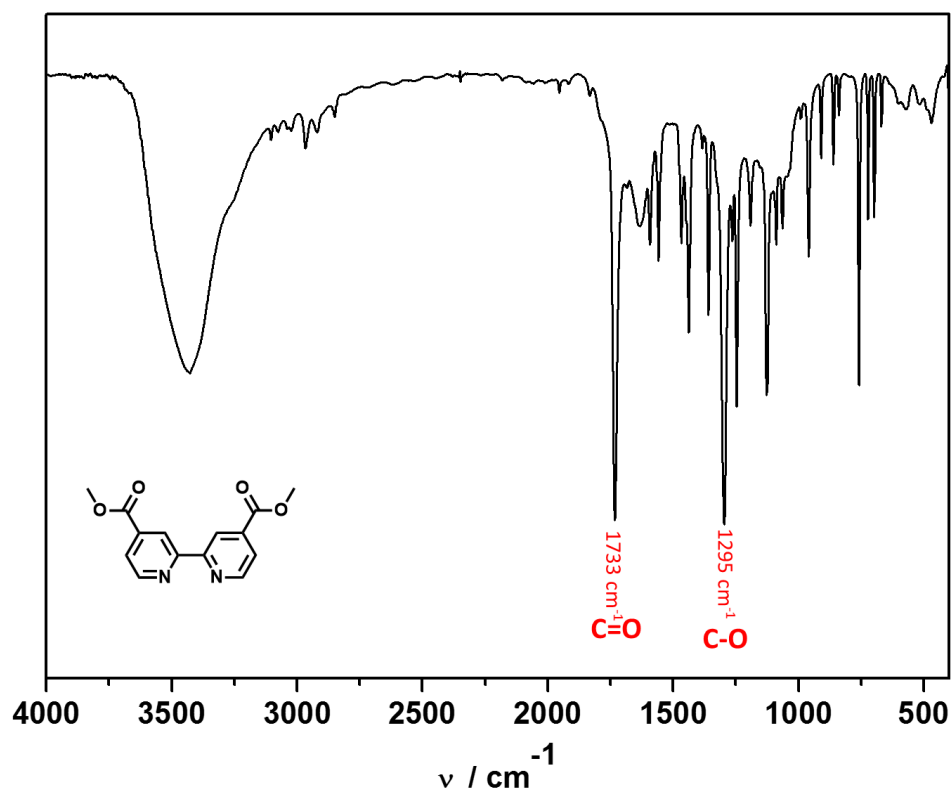

**Figure S6.** IR spectrum for  $\text{dmbc}$  in  $\text{KBr}$ .

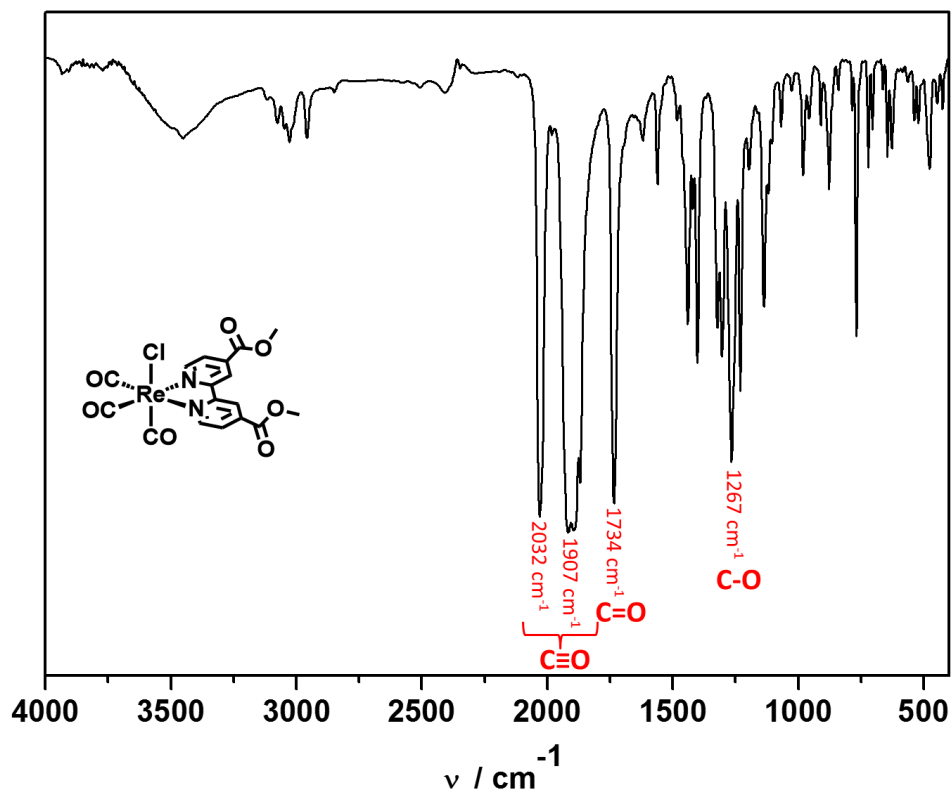

Figure S7. IR spectrum for *fac*-[Re(CO)<sub>3</sub>(dmcb)Cl] in KBr.

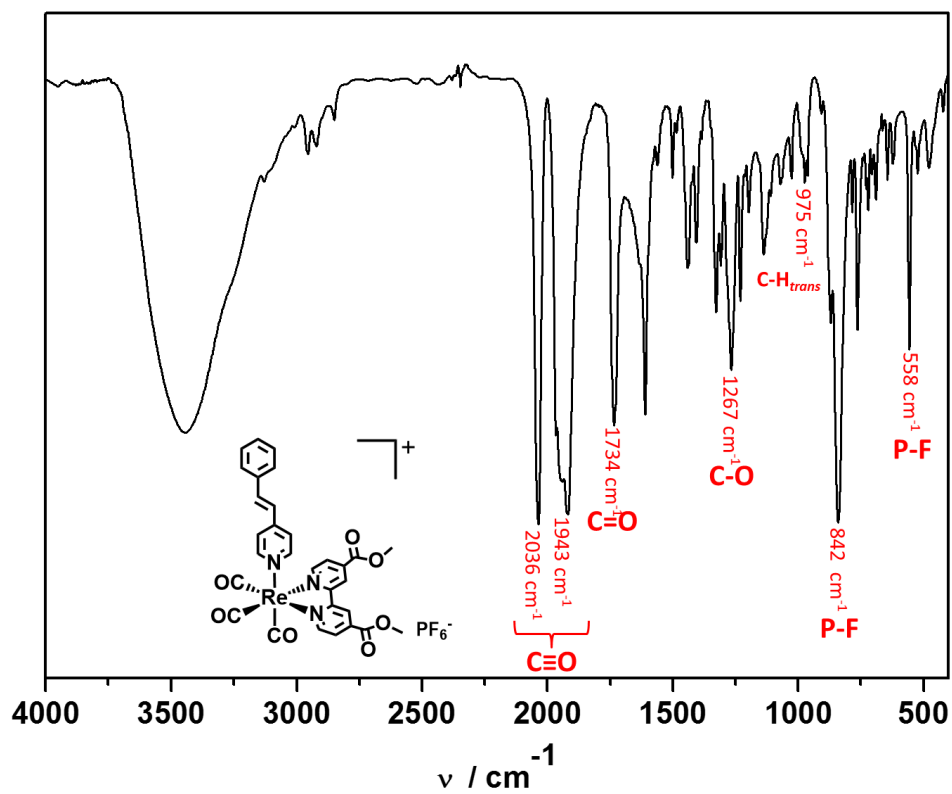

Figure S8. IR spectrum for *fac*-[Re(CO)<sub>3</sub>(dmcb)(*trans*-stpy)] in KBr.

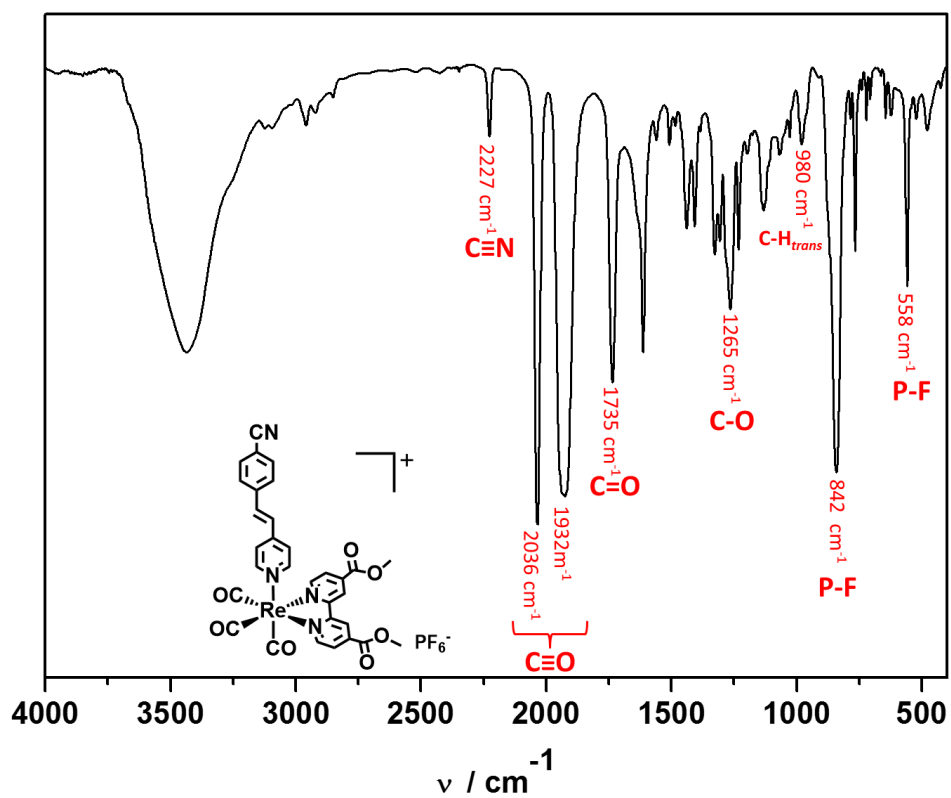

Figure S9. IR spectrum for *fac*-[Re(CO)<sub>3</sub>(dmcb)(*trans*-stpyCN)] in KBr.

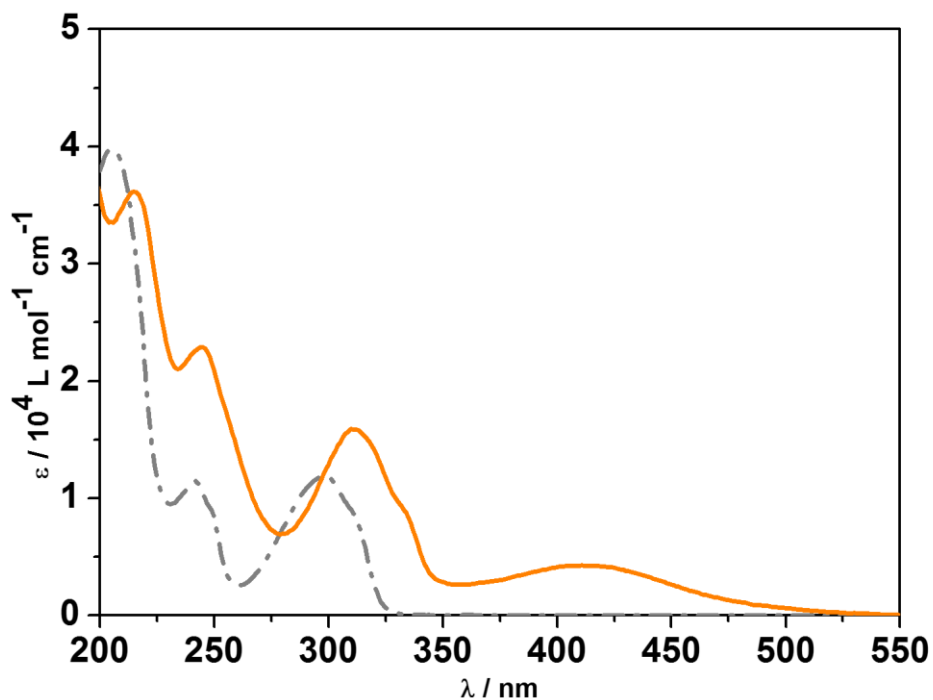

Figure S10. Electronic spectra for *fac*-[Re(CO)<sub>3</sub>(dmcb)Cl] (orange —) and dmcb (gray - - -) in CH<sub>3</sub>CN at 298 K.

**Table S1.**  $^1\text{H}$  NMR spectral data (300 MHz or 500 MHz) for  $\text{fac-}[\text{Re}(\text{CO})_3(\text{dmcb})(\text{trans-stpy})]^+$ ,  $\text{fac-}[\text{Re}(\text{CO})_3(\text{dmcb})(\text{trans-stpyCN})]^+$ ,  $\text{fac-}[\text{Re}(\text{CO})_3(\text{dmcb})(\text{cis-stpy})]^+$  and  $\text{fac-}[\text{Re}(\text{CO})_3(\text{dmcb})(\text{cis-stpyCN})]^+$  in  $\text{CD}_3\text{CN}$  at 298K.

| Complex                                                                                                                                                      | Hydrogen     | $\delta$ / ppm         | $J$ / Hz                                        |
|--------------------------------------------------------------------------------------------------------------------------------------------------------------|--------------|------------------------|-------------------------------------------------|
| $\text{fac-}[\text{Re}(\text{CO})_3(\text{dmcb})(\text{trans-stpy})]^+$ 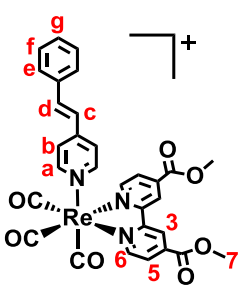    | 3            | 8.90 (dd, 2H)          | $J^A = 1.6 \text{ Hz}$ , $J^B = 0.7 \text{ Hz}$ |
|                                                                                                                                                              | 5            | 8.22 (dd, 2H)          | $J^B = 5.7 \text{ Hz}$ , $J^A = 1.7 \text{ Hz}$ |
|                                                                                                                                                              | 6            | 9.40 (dd, 2H)          | $J^B = 5.7 \text{ Hz}$ , $J^C = 0.7 \text{ Hz}$ |
|                                                                                                                                                              | 7            | 4.02 (s, 6H)           |                                                 |
|                                                                                                                                                              | a            | 8.10 (dd, 2H)          | $J^B = 6.8 \text{ Hz}$ , $J^C = 1.4 \text{ Hz}$ |
|                                                                                                                                                              | b            | 7.56 (dd, 2H)          | $J^B = 7.4 \text{ Hz}$ , $J^C = 1.9 \text{ Hz}$ |
|                                                                                                                                                              | c            | <b>7.45 (d, 1H)</b>    | $J^B = 16.4 \text{ Hz}$                         |
|                                                                                                                                                              | d            | <b>7.05 (d, 1H)</b>    | $J^B = 16.4 \text{ Hz}$                         |
| $\text{fac-}[\text{Re}(\text{CO})_3(\text{dcmb})(\text{trans-stpyCN})]^+$  | 3            | 8.91 (s, 2H)           |                                                 |
|                                                                                                                                                              | 5            | 8.22 (dd, 2H)          | $J^B = 5.7 \text{ Hz}$ , $J^A = 1.5 \text{ Hz}$ |
|                                                                                                                                                              | 6            | 9.40 (d, 2H)           | $J^B = 5.7 \text{ Hz}$                          |
|                                                                                                                                                              | 7            | 4.02 (s, 6H)           |                                                 |
|                                                                                                                                                              | a            | 8.15 (d, 2H)           | $J^B = 6.7 \text{ Hz}$                          |
|                                                                                                                                                              | b            | 7.38 (d, 2H)           | $J^B = 6.7 \text{ Hz}$                          |
|                                                                                                                                                              | c            | <b>7.45 (d, 1H)</b>    | $J^B = 16.5 \text{ Hz}$                         |
|                                                                                                                                                              | d            | <b>7.18 (d, 1H)</b>    | $J^B = 16.5 \text{ Hz}$                         |
| $\text{fac-}[\text{Re}(\text{CO})_3(\text{dcmb})(\text{cis-stpy})]^+$     | 3'           | 8.90 (dd, 2H)          | $J^A = 1.6 \text{ Hz}$ , $J^B = 0.7 \text{ Hz}$ |
|                                                                                                                                                              | 5'           | 8.18 (dd, 2H)          | $J^B = 5.7 \text{ Hz}$ , $J^A = 1.7 \text{ Hz}$ |
|                                                                                                                                                              | 6'           | 9.34 (dd, 2H)          | $J^B = 5.7 \text{ Hz}$ , $J^C = 0.7 \text{ Hz}$ |
|                                                                                                                                                              | 7'           | 4.03 (s, 6H)           |                                                 |
|                                                                                                                                                              | a'           | 7.96 (dd, 2H)          | $J^B = 5.2 \text{ Hz}$ , $J^C = 1.5 \text{ Hz}$ |
|                                                                                                                                                              | b'e'         | 7.05 (m, 2H)           |                                                 |
|                                                                                                                                                              | c'           | <b>6.93 (d, 1H)</b>    | $J^B = 12.2 \text{ Hz}$                         |
|                                                                                                                                                              | d'           | <b>6.93 (d, 1H)</b>    | $J^B = 12.2 \text{ Hz}$                         |
| $\text{fac-}[\text{Re}(\text{CO})_3(\text{dcmb})(\text{cis-stpyCN})]^+$   | 3'           | 8.90 (s, 2H)           |                                                 |
|                                                                                                                                                              | 5'           | 6.62 (dd, 2H)          | $J^B = 5.5 \text{ Hz}$ , $J^A = 1.2 \text{ Hz}$ |
|                                                                                                                                                              | 6'           | 9.34 (d, 2H)           | $J^B = 5.7 \text{ Hz}$                          |
|                                                                                                                                                              | 7'           | 4.02 (s, 6H)           |                                                 |
|                                                                                                                                                              | a'           | 7.97 (d, 2H)           | $J^B = 6.5 \text{ Hz}$                          |
|                                                                                                                                                              | b'           | 6.96 (d, 2H)           | $J^B = 6.5 \text{ Hz}$                          |
|                                                                                                                                                              | c'           | <b>6.93 (d, 1H)</b>    | $J^B = 12.4 \text{ Hz}$                         |
|                                                                                                                                                              | d'           | <b>6.57 (d, 1H)</b>    | $J^B = 12.2 \text{ Hz}$                         |
| e'                                                                                                                                                           | 7.20 (d, 2H) | $J^B = 7.5 \text{ Hz}$ |                                                 |
| f'                                                                                                                                                           | 7.53 (d, 2H) | $J^B = 8.2 \text{ Hz}$ |                                                 |



## 2. True and apparent quantum yields for *fac*-[Re(CO)<sub>3</sub>(dmcb)(stpy)]<sup>+</sup> and *fac*-[Re(CO)<sub>3</sub>(dmcb)(stpyCN)]<sup>+</sup> complexes.

**Table S2.** *trans*-to-*cis* photoisomerization quantum yields at 313 nm irradiation for *fac*-[Re(CO)<sub>3</sub>(dmcb)(*trans*-stpy)]<sup>+</sup> in CH<sub>3</sub>CN (*I*<sub>0</sub> = 6.00x10<sup>14</sup> quanta s<sup>-1</sup>, Δ*t* = 30 s).

| $\lambda_{\text{monitoring}}$<br>/ nm | concentration/<br>10 <sup>-4</sup> mol L <sup>-1</sup> | % photolysis<br>apparent | $\Phi_{\text{trans} \rightarrow \text{cis}}^{\text{apparent}}$ | % photolysis<br>true | $\Phi_{\text{trans} \rightarrow \text{cis}}^{\text{true}}$ | $\Phi_{\text{trans} \rightarrow \text{cis}}^{\text{apparent average}}$ | $\Phi_{\text{trans} \rightarrow \text{cis}}^{\text{true average}}$ |
|---------------------------------------|--------------------------------------------------------|--------------------------|----------------------------------------------------------------|----------------------|------------------------------------------------------------|------------------------------------------------------------------------|--------------------------------------------------------------------|
| 330                                   | 9.1                                                    | 3.0                      | 0.27                                                           | 5.9                  | 0.54                                                       | 0.27 ± 0.02                                                            | 0.54 ± 0.03                                                        |
|                                       |                                                        | 5.7                      | 0.26                                                           | 11.5                 | 0.52                                                       |                                                                        |                                                                    |
|                                       |                                                        | 8.6                      | 0.26                                                           | 17.2                 | 0.53                                                       |                                                                        |                                                                    |
|                                       | 9.1                                                    | 3.2                      | 0.29                                                           | 6.4                  | 0.58                                                       |                                                                        |                                                                    |
|                                       |                                                        | 6.0                      | 0.27                                                           | 11.9                 | 0.55                                                       |                                                                        |                                                                    |
|                                       |                                                        | 8.5                      | 0.26                                                           | 17.1                 | 0.52                                                       |                                                                        |                                                                    |
|                                       | 9.1                                                    | 3.3                      | 0.30                                                           | 6.6                  | 0.60                                                       |                                                                        |                                                                    |
|                                       |                                                        | 5.6                      | 0.26                                                           | 11.2                 | 0.51                                                       |                                                                        |                                                                    |
|                                       |                                                        | 8.1                      | 0.25                                                           | 6.2                  | 0.49                                                       |                                                                        |                                                                    |
| 335                                   | 9.1                                                    | 3.2                      | 0.30                                                           | 6.2                  | 0.57                                                       | 0.29 ± 0.02                                                            | 0.55 ± 0.04                                                        |
|                                       |                                                        | 6.1                      | 0.28                                                           | 11.7                 | 0.54                                                       |                                                                        |                                                                    |
|                                       |                                                        | 9.0                      | 0.28                                                           | 17.3                 | 0.53                                                       |                                                                        |                                                                    |
|                                       | 9.1                                                    | 3.4                      | 0.31                                                           | 6.5                  | 0.60                                                       |                                                                        |                                                                    |
|                                       |                                                        | 6.3                      | 0.29                                                           | 12.1                 | 0.55                                                       |                                                                        |                                                                    |
|                                       |                                                        | 8.9                      | 0.27                                                           | 17.0                 | 0.52                                                       |                                                                        |                                                                    |
|                                       | 9.1                                                    | 3.6                      | 0.33                                                           | 7.0                  | 0.63                                                       |                                                                        |                                                                    |
|                                       |                                                        | 5.9                      | 0.27                                                           | 11.3                 | 0.51                                                       |                                                                        |                                                                    |
|                                       |                                                        | 8.6                      | 0.26                                                           | 16.4                 | 0.50                                                       |                                                                        |                                                                    |
| 340                                   | 9.1                                                    | 3.1                      | 0.29                                                           | 5.5                  | 0.50                                                       | 0.30 ± 0.02                                                            | 0.52 ± 0.04                                                        |
|                                       |                                                        | 6.4                      | 0.30                                                           | 11.2                 | 0.51                                                       |                                                                        |                                                                    |
|                                       |                                                        | 9.6                      | 0.29                                                           | 16.7                 | 0.51                                                       |                                                                        |                                                                    |
|                                       | 9.1                                                    | 3.6                      | 0.33                                                           | 6.3                  | 0.58                                                       |                                                                        |                                                                    |
|                                       |                                                        | 6.8                      | 0.31                                                           | 11.8                 | 0.54                                                       |                                                                        |                                                                    |
|                                       |                                                        | 9.6                      | 0.29                                                           | 16.8                 | 0.51                                                       |                                                                        |                                                                    |
|                                       | 9.1                                                    | 3.6                      | 0.33                                                           | 6.3                  | 0.58                                                       |                                                                        |                                                                    |
|                                       |                                                        | 6.0                      | 0.28                                                           | 10.5                 | 0.48                                                       |                                                                        |                                                                    |
|                                       |                                                        | 8.9                      | 0.27                                                           | 15.6                 | 0.47                                                       |                                                                        |                                                                    |
| <b>Average</b>                        |                                                        |                          |                                                                |                      |                                                            | <b>0.29 ± 0.02</b>                                                     | <b>0.54 ± 0.04</b>                                                 |

**Table S3.** *trans*-to-*cis* photoisomerization quantum yields at 334 nm irradiation for *fac*-[Re(CO)<sub>3</sub>(dmcb)(*trans*-stpy)]<sup>+</sup> in CH<sub>3</sub>CN ( $I_0 = 1.43 \times 10^{15}$  quanta s<sup>-1</sup>,  $\Delta t = 10$  s).

| $\lambda_{\text{monitoring}} / \text{nm}$ | concentration / $10^{-4} \text{ mol L}^{-1}$ | % photolysis apparent | $\Phi_{\text{trans} \rightarrow \text{cis}}^{\text{apparent}}$ | % photolysis true | $\Phi_{\text{trans} \rightarrow \text{cis}}^{\text{true}}$ | $\Phi_{\text{trans} \rightarrow \text{cis}}^{\text{apparent average}}$ | $\Phi_{\text{trans} \rightarrow \text{cis}}^{\text{true average}}$ |                 |                                   |                                   |
|-------------------------------------------|----------------------------------------------|-----------------------|----------------------------------------------------------------|-------------------|------------------------------------------------------------|------------------------------------------------------------------------|--------------------------------------------------------------------|-----------------|-----------------------------------|-----------------------------------|
| 330                                       | 7.9                                          | 2.4                   | 0.24                                                           | 5.2               | 0.52                                                       | $0.27 \pm 0.02$                                                        | $0.57 \pm 0.03$                                                    |                 |                                   |                                   |
|                                           |                                              | 5.1                   | 0.26                                                           | 10.9              | 0.54                                                       |                                                                        |                                                                    |                 |                                   |                                   |
|                                           |                                              | 7.6                   | 0.25                                                           | 16.1              | 0.53                                                       |                                                                        |                                                                    |                 |                                   |                                   |
|                                           | 7.9                                          | 2.9                   | 0.28                                                           | 6.1               | 0.60                                                       |                                                                        |                                                                    |                 |                                   |                                   |
|                                           |                                              | 5.4                   | 0.27                                                           | 11.6              | 0.57                                                       |                                                                        |                                                                    |                 |                                   |                                   |
|                                           |                                              | 8.0                   | 0.26                                                           | 17.0              | 0.56                                                       |                                                                        |                                                                    |                 |                                   |                                   |
|                                           | 7.9                                          | 2.9                   | 0.29                                                           | 6.2               | 0.62                                                       |                                                                        |                                                                    |                 |                                   |                                   |
|                                           |                                              | 5.6                   | 0.28                                                           | 12.0              | 0.60                                                       |                                                                        |                                                                    |                 |                                   |                                   |
|                                           |                                              | 8.2                   | 0.27                                                           | 17.5              | 0.58                                                       |                                                                        |                                                                    |                 |                                   |                                   |
|                                           | 335                                          | 7.9                   | 2.6                                                            | 0.25              | 4.9                                                        |                                                                        |                                                                    | 0.49            | $0.28 \pm 0.01$                   | $0.53 \pm 0.02$                   |
|                                           |                                              |                       | 5.8                                                            | 0.29              | 11.0                                                       |                                                                        |                                                                    | 0.55            |                                   |                                   |
|                                           |                                              |                       | 8.2                                                            | 0.27              | 15.6                                                       |                                                                        |                                                                    | 0.52            |                                   |                                   |
| 7.9                                       |                                              | 2.9                   | 0.28                                                           | 5.5               | 0.54                                                       |                                                                        |                                                                    |                 |                                   |                                   |
|                                           |                                              | 5.8                   | 0.29                                                           | 11.0              | 0.55                                                       |                                                                        |                                                                    |                 |                                   |                                   |
|                                           |                                              | 8.4                   | 0.28                                                           | 16.0              | 0.52                                                       |                                                                        |                                                                    |                 |                                   |                                   |
| 7.9                                       |                                              | 2.9                   | 0.29                                                           | 5.6               | 0.55                                                       |                                                                        |                                                                    |                 |                                   |                                   |
|                                           |                                              | 5.6                   | 0.28                                                           | 10.7              | 0.53                                                       |                                                                        |                                                                    |                 |                                   |                                   |
|                                           |                                              | 8.5                   | 0.28                                                           | 16.1              | 0.53                                                       |                                                                        |                                                                    |                 |                                   |                                   |
| 340                                       |                                              | 7.9                   | 2.9                                                            | 0.29              | 5.2                                                        | 0.51                                                                   | $0.31 \pm 0.01$                                                    | $0.55 \pm 0.02$ |                                   |                                   |
|                                           |                                              |                       | 6.5                                                            | 0.32              | 11.6                                                       | 0.58                                                                   |                                                                    |                 |                                   |                                   |
|                                           |                                              |                       | 9.3                                                            | 0.31              | 16.6                                                       | 0.55                                                                   |                                                                    |                 |                                   |                                   |
|                                           | 7.9                                          | 3.1                   | 0.31                                                           | 5.5               | 0.55                                                       |                                                                        |                                                                    |                 |                                   |                                   |
|                                           |                                              | 6.4                   | 0.32                                                           | 11.3              | 0.56                                                       |                                                                        |                                                                    |                 |                                   |                                   |
|                                           |                                              | 9.1                   | 0.30                                                           | 16.1              | 0.53                                                       |                                                                        |                                                                    |                 |                                   |                                   |
|                                           | 7.9                                          | 3.2                   | 0.32                                                           | 5.7               | 0.57                                                       |                                                                        |                                                                    |                 |                                   |                                   |
|                                           |                                              | 6.3                   | 0.31                                                           | 11.2              | 0.56                                                       |                                                                        |                                                                    |                 |                                   |                                   |
|                                           |                                              | 9.2                   | 0.31                                                           | 16.4              | 0.54                                                       |                                                                        |                                                                    |                 |                                   |                                   |
|                                           | <b>Average</b>                               |                       |                                                                |                   |                                                            |                                                                        |                                                                    |                 | <b><math>0.29 \pm 0.02</math></b> | <b><math>0.55 \pm 0.03</math></b> |

**Table S4.** *trans*-to-*cis* photoisomerization quantum yields at 365 nm irradiation for *fac*-[Re(CO)<sub>3</sub>(dmcb)(*trans*-stpy)]<sup>+</sup> in CH<sub>3</sub>CN (*I*<sub>0</sub> = 6.93x10<sup>15</sup> quanta s<sup>-1</sup>, Δ*t* = 8 s).

| $\lambda_{\text{monitoring}} / \text{nm}$ | concentration/<br>10 <sup>-4</sup> mol L <sup>-1</sup> | % photolysis<br>apparent | $\Phi_{\text{trans} \rightarrow \text{cis}}^{\text{apparent}}$ | % photolysis<br>true | $\Phi_{\text{trans} \rightarrow \text{cis}}^{\text{true}}$ | $\Phi_{\text{trans} \rightarrow \text{cis}}^{\text{apparent average}}$ | $\Phi_{\text{trans} \rightarrow \text{cis}}^{\text{true average}}$ |
|-------------------------------------------|--------------------------------------------------------|--------------------------|----------------------------------------------------------------|----------------------|------------------------------------------------------------|------------------------------------------------------------------------|--------------------------------------------------------------------|
| 330                                       | 2.9                                                    | 2.9                      | 0.28                                                           | 5.9                  | 0.55                                                       | 0.26 ± 0.01                                                            | 0.53 ± 0.01                                                        |
|                                           |                                                        | 5.8                      | 0.27                                                           | 11.6                 | 0.54                                                       |                                                                        |                                                                    |
|                                           |                                                        | 8.5                      | 0.26                                                           | 16.9                 | 0.53                                                       |                                                                        |                                                                    |
|                                           | 2.9                                                    | 2.8                      | 0.26                                                           | 5.5                  | 0.52                                                       |                                                                        |                                                                    |
|                                           |                                                        | 5.8                      | 0.27                                                           | 11.7                 | 0.55                                                       |                                                                        |                                                                    |
|                                           |                                                        | 8.3                      | 0.26                                                           | 16.5                 | 0.52                                                       |                                                                        |                                                                    |
|                                           | 2.9                                                    | 2.7                      | 0.25                                                           | 5.4                  | 0.51                                                       |                                                                        |                                                                    |
|                                           |                                                        | 5.6                      | 0.26                                                           | 11.1                 | 0.52                                                       |                                                                        |                                                                    |
|                                           |                                                        | 8.3                      | 0.26                                                           | 16.6                 | 0.52                                                       |                                                                        |                                                                    |
| 335                                       | 2.9                                                    | 3.2                      | 0.30                                                           | 6.2                  | 0.58                                                       | 0.28 ± 0.01                                                            | 0.53 ± 0.02                                                        |
|                                           |                                                        | 6.0                      | 0.28                                                           | 11.4                 | 0.53                                                       |                                                                        |                                                                    |
|                                           |                                                        | 8.8                      | 0.27                                                           | 16.8                 | 0.52                                                       |                                                                        |                                                                    |
|                                           | 2.9                                                    | 3.0                      | 0.28                                                           | 5.8                  | 0.54                                                       |                                                                        |                                                                    |
|                                           |                                                        | 5.6                      | 0.26                                                           | 10.8                 | 0.50                                                       |                                                                        |                                                                    |
|                                           |                                                        | 8.6                      | 0.27                                                           | 16.5                 | 0.51                                                       |                                                                        |                                                                    |
|                                           | 2.9                                                    | 3.1                      | 0.29                                                           | 5.9                  | 0.55                                                       |                                                                        |                                                                    |
|                                           |                                                        | 5.9                      | 0.28                                                           | 11.3                 | 0.53                                                       |                                                                        |                                                                    |
|                                           |                                                        | 8.8                      | 0.27                                                           | 16.8                 | 0.53                                                       |                                                                        |                                                                    |
| 340                                       | 2.9                                                    | 3.5                      | 0.32                                                           | 6.0                  | 0.57                                                       | 0.30 ± 0.01                                                            | 0.53 ± 0.02                                                        |
|                                           |                                                        | 6.7                      | 0.31                                                           | 11.7                 | 0.55                                                       |                                                                        |                                                                    |
|                                           |                                                        | 9.7                      | 0.30                                                           | 17.0                 | 0.53                                                       |                                                                        |                                                                    |
|                                           | 2.9                                                    | 3.2                      | 0.30                                                           | 5.6                  | 0.53                                                       |                                                                        |                                                                    |
|                                           |                                                        | 6.3                      | 0.30                                                           | 11.0                 | 0.52                                                       |                                                                        |                                                                    |
|                                           |                                                        | 9.3                      | 0.29                                                           | 16.2                 | 0.51                                                       |                                                                        |                                                                    |
|                                           | 2.9                                                    | 3.2                      | 0.30                                                           | 5.5                  | 0.52                                                       |                                                                        |                                                                    |
|                                           |                                                        | 6.4                      | 0.30                                                           | 11.1                 | 0.52                                                       |                                                                        |                                                                    |
|                                           |                                                        | 9.2                      | 0.29                                                           | 16.1                 | 0.50                                                       |                                                                        |                                                                    |
|                                           |                                                        |                          |                                                                |                      | <b>Average</b>                                             | <b>0.28 ± 0.02</b>                                                     | <b>0.53 ± 0.02</b>                                                 |

**Table S5.** *trans*-to-*cis* photoisomerization quantum yields at 404 nm irradiation for *fac*-[Re(CO)<sub>3</sub>(dmcb)(*trans*-stpy)]<sup>+</sup> in CH<sub>3</sub>CN ( $I_0 = 2.2 \times 10^{15}$  quanta s<sup>-1</sup>,  $\Delta t = 40$  s).

| $\lambda_{\text{monitoring}} / \text{nm}$ | concentration / $10^{-4} \text{ mol L}^{-1}$ | % photolysis apparent | $\Phi_{\text{trans} \rightarrow \text{cis}}^{\text{apparent}}$ | % photolysis true | $\Phi_{\text{trans} \rightarrow \text{cis}}^{\text{true}}$ | $\Phi_{\text{trans} \rightarrow \text{cis}}^{\text{apparent average}}$ | $\Phi_{\text{trans} \rightarrow \text{cis}}^{\text{true average}}$ |                 |                                   |                 |
|-------------------------------------------|----------------------------------------------|-----------------------|----------------------------------------------------------------|-------------------|------------------------------------------------------------|------------------------------------------------------------------------|--------------------------------------------------------------------|-----------------|-----------------------------------|-----------------|
| 330                                       | 3.4                                          | 3.4                   | 0.25                                                           | 6.9               | 0.50                                                       | $0.21 \pm 0.02$                                                        | $0.43 \pm 0.04$                                                    |                 |                                   |                 |
|                                           |                                              | 6.4                   | 0.23                                                           | 12.8              | 0.46                                                       |                                                                        |                                                                    |                 |                                   |                 |
|                                           |                                              | 9.0                   | 0.22                                                           | 17.9              | 0.43                                                       |                                                                        |                                                                    |                 |                                   |                 |
|                                           | 3.4                                          | 3.1                   | 0.22                                                           | 6.1               | 0.44                                                       |                                                                        |                                                                    |                 |                                   |                 |
|                                           |                                              | 6.0                   | 0.22                                                           | 12.0              | 0.43                                                       |                                                                        |                                                                    |                 |                                   |                 |
|                                           |                                              | 8.2                   | 0.20                                                           | 16.4              | 0.40                                                       |                                                                        |                                                                    |                 |                                   |                 |
|                                           | 3.4                                          | 2.7                   | 0.20                                                           | 5.4               | 0.39                                                       |                                                                        |                                                                    |                 |                                   |                 |
|                                           |                                              | 5.4                   | 0.20                                                           | 10.8              | 0.39                                                       |                                                                        |                                                                    |                 |                                   |                 |
|                                           |                                              | 8.2                   | 0.20                                                           | 16.3              | 0.39                                                       |                                                                        |                                                                    |                 |                                   |                 |
|                                           | 335                                          | 3.4                   | 3.0                                                            | 0.22              | 5.8                                                        |                                                                        |                                                                    | 0.42            | $0.22 \pm 0.01$                   | $0.42 \pm 0.01$ |
|                                           |                                              |                       | 6.5                                                            | 0.23              | 12.4                                                       |                                                                        |                                                                    | 0.45            |                                   |                 |
|                                           |                                              |                       | 9.1                                                            | 0.22              | 17.3                                                       |                                                                        |                                                                    | 0.42            |                                   |                 |
| 3.4                                       |                                              | 3.1                   | 0.22                                                           | 5.9               | 0.42                                                       |                                                                        |                                                                    |                 |                                   |                 |
|                                           |                                              | 6.0                   | 0.22                                                           | 11.5              | 0.42                                                       |                                                                        |                                                                    |                 |                                   |                 |
|                                           |                                              | 8.6                   | 0.21                                                           | 16.5              | 0.40                                                       |                                                                        |                                                                    |                 |                                   |                 |
| 3.4                                       |                                              | 3.0                   | 0.22                                                           | 5.8               | 0.42                                                       |                                                                        |                                                                    |                 |                                   |                 |
|                                           |                                              | 5.8                   | 0.21                                                           | 11.1              | 0.40                                                       |                                                                        |                                                                    |                 |                                   |                 |
|                                           |                                              | 8.9                   | 0.21                                                           | 17.0              | 0.41                                                       |                                                                        |                                                                    |                 |                                   |                 |
| 340                                       |                                              | 3.4                   | 3.7                                                            | 0.27              | 6.4                                                        | 0.46                                                                   | $0.24 \pm 0.01$                                                    | $0.43 \pm 0.02$ |                                   |                 |
|                                           |                                              |                       | 6.8                                                            | 0.25              | 11.9                                                       | 0.43                                                                   |                                                                    |                 |                                   |                 |
|                                           |                                              |                       | 9.8                                                            | 0.24              | 17.1                                                       | 0.41                                                                   |                                                                    |                 |                                   |                 |
|                                           | 3.4                                          | 3.4                   | 0.25                                                           | 5.9               | 0.43                                                       |                                                                        |                                                                    |                 |                                   |                 |
|                                           |                                              | 6.8                   | 0.25                                                           | 11.9              | 0.43                                                       |                                                                        |                                                                    |                 |                                   |                 |
|                                           |                                              | 9.7                   | 0.23                                                           | 16.9              | 0.41                                                       |                                                                        |                                                                    |                 |                                   |                 |
|                                           | 3.4                                          | 3.5                   | 0.26                                                           | 6.2               | 0.45                                                       |                                                                        |                                                                    |                 |                                   |                 |
|                                           |                                              | 6.5                   | 0.24                                                           | 11.4              | 0.41                                                       |                                                                        |                                                                    |                 |                                   |                 |
|                                           |                                              | 9.5                   | 0.23                                                           | 16.5              | 0.40                                                       |                                                                        |                                                                    |                 |                                   |                 |
|                                           | <b>Average</b>                               |                       |                                                                |                   |                                                            | <b><math>0.23 \pm 0.02</math></b>                                      |                                                                    |                 | <b><math>0.43 \pm 0.03</math></b> |                 |

**Table S6.** *trans*-to-*cis* photoisomerization quantum yields at 436 nm irradiation for *fac*-[Re(CO)<sub>3</sub>(dmcb)(*trans*-stpy)]<sup>+</sup> in CH<sub>3</sub>CN ( $I_0 = 3.6 \times 10^{15}$  quanta s<sup>-1</sup>,  $\Delta t = 40$  s).

| $\lambda_{\text{monitoring}} / \text{nm}$ | concentration / $10^{-4} \text{ mol L}^{-1}$ | % photolysis apparent | $\Phi_{\text{trans} \rightarrow \text{cis}}^{\text{apparent}}$ | % photolysis true | $\Phi_{\text{trans} \rightarrow \text{cis}}^{\text{true}}$ | $\Phi_{\text{trans} \rightarrow \text{cis}}^{\text{apparent average}}$ | $\Phi_{\text{trans} \rightarrow \text{cis}}^{\text{true average}}$ |
|-------------------------------------------|----------------------------------------------|-----------------------|----------------------------------------------------------------|-------------------|------------------------------------------------------------|------------------------------------------------------------------------|--------------------------------------------------------------------|
| 330                                       | 3.4                                          | 4.4                   | 0.23                                                           | 9.3               | 0.51                                                       | $0.21 \pm 0.02$                                                        | $0.47 \pm 0.05$                                                    |
|                                           |                                              | 7.6                   | 0.20                                                           | 16.2              | 0.44                                                       |                                                                        |                                                                    |
|                                           |                                              | 10.6                  | 0.18                                                           | 22.6              | 0.41                                                       |                                                                        |                                                                    |
|                                           | 3.4                                          | 3.6                   | 0.21                                                           | 7.6               | 0.48                                                       |                                                                        |                                                                    |
|                                           |                                              | 6.7                   | 0.20                                                           | 14.2              | 0.44                                                       |                                                                        |                                                                    |
|                                           |                                              | 9.6                   | 0.19                                                           | 20.5              | 0.43                                                       |                                                                        |                                                                    |
|                                           | 3.5                                          | 3.7                   | 0.26                                                           | 7.9               | 0.59                                                       |                                                                        |                                                                    |
|                                           |                                              | 5.7                   | 0.20                                                           | 12.1              | 0.45                                                       |                                                                        |                                                                    |
|                                           |                                              | 8.8                   | 0.21                                                           | 18.6              | 0.47                                                       |                                                                        |                                                                    |
| 335                                       | 3.4                                          | 4.0                   | 0.21                                                           | 7.7               | 0.42                                                       | $0.21 \pm 0.02$                                                        | $0.42 \pm 0.05$                                                    |
|                                           |                                              | 7.6                   | 0.20                                                           | 14.5              | 0.40                                                       |                                                                        |                                                                    |
|                                           |                                              | 11.1                  | 0.19                                                           | 21.1              | 0.39                                                       |                                                                        |                                                                    |
|                                           | 3.4                                          | 3.6                   | 0.21                                                           | 6.8               | 0.42                                                       |                                                                        |                                                                    |
|                                           |                                              | 6.8                   | 0.20                                                           | 13.0              | 0.41                                                       |                                                                        |                                                                    |
|                                           |                                              | 10.1                  | 0.20                                                           | 19.2              | 0.40                                                       |                                                                        |                                                                    |
|                                           | 3.5                                          | 3.8                   | 0.27                                                           | 7.3               | 0.54                                                       |                                                                        |                                                                    |
|                                           |                                              | 6.0                   | 0.21                                                           | 11.5              | 0.43                                                       |                                                                        |                                                                    |
|                                           |                                              | 9.0                   | 0.21                                                           | 17.1              | 0.43                                                       |                                                                        |                                                                    |
| 340                                       | 3.4                                          | 4.3                   | 0.23                                                           | 7.7               | 0.42                                                       | $0.23 \pm 0.02$                                                        | $0.43 \pm 0.03$                                                    |
|                                           |                                              | 8.5                   | 0.22                                                           | 15.1              | 0.41                                                       |                                                                        |                                                                    |
|                                           |                                              | 11.8                  | 0.21                                                           | 21.1              | 0.39                                                       |                                                                        |                                                                    |
|                                           | 3.4                                          | 4.2                   | 0.25                                                           | 7.4               | 0.46                                                       |                                                                        |                                                                    |
|                                           |                                              | 7.9                   | 0.23                                                           | 14.1              | 0.44                                                       |                                                                        |                                                                    |
|                                           |                                              | 11.2                  | 0.22                                                           | 19.9              | 0.41                                                       |                                                                        |                                                                    |
|                                           | 3.5                                          | 3.7                   | 0.26                                                           | 6.7               | 0.49                                                       |                                                                        |                                                                    |
|                                           |                                              | 6.7                   | 0.24                                                           | 12.0              | 0.45                                                       |                                                                        |                                                                    |
|                                           |                                              | 9.3                   | 0.22                                                           | 16.6              | 0.41                                                       |                                                                        |                                                                    |
| <b>Average</b>                            |                                              |                       |                                                                |                   |                                                            | <b><math>0.22 \pm 0.02</math></b>                                      | <b><math>0.44 \pm 0.05</math></b>                                  |

**Table S7.** *trans*-to-*cis* photoisomerization quantum yields at 313 nm irradiation for *fac*-[Re(CO)<sub>3</sub>(dmcB)(*trans*-stpyCN)]<sup>+</sup> in CH<sub>3</sub>CN (*I*<sub>0</sub> = 1.50x10<sup>15</sup> quanta s<sup>-1</sup>, <sup>a</sup>Δ*t* = 10 s, <sup>b</sup>Δ*t* = 20 s).

| $\lambda_{\text{monitoring}} / \text{nm}$ | concentration / $10^{-4} \text{ mol L}^{-1}$ | % photolysis apparent | $\Phi_{\text{trans} \rightarrow \text{cis}}^{\text{apparent}}$ | % photolysis true | $\Phi_{\text{trans} \rightarrow \text{cis}}^{\text{true}}$ | $\Phi_{\text{trans} \rightarrow \text{cis}}^{\text{apparent average}}$ | $\Phi_{\text{trans} \rightarrow \text{cis}}^{\text{true average}}$ |
|-------------------------------------------|----------------------------------------------|-----------------------|----------------------------------------------------------------|-------------------|------------------------------------------------------------|------------------------------------------------------------------------|--------------------------------------------------------------------|
| 330                                       | 9.0 <sup>a</sup>                             | 2.9                   | 0.32                                                           | 6.5               | 0.70                                                       | 0.30 ± 0.02                                                            | 0.66 ± 0.05                                                        |
|                                           |                                              | 7.8                   | 0.28                                                           | 17.3              | 0.63                                                       |                                                                        |                                                                    |
|                                           |                                              | 9.4                   | 0.26                                                           | 20.9              | 0.57                                                       |                                                                        |                                                                    |
|                                           | 9.2 <sup>b</sup>                             | 2.7                   | 0.32                                                           | 6.4               | 0.71                                                       |                                                                        |                                                                    |
|                                           |                                              | 7.9                   | 0.29                                                           | 17.6              | 0.65                                                       |                                                                        |                                                                    |
|                                           |                                              | 10.4                  | 0.29                                                           | 23.0              | 0.64                                                       |                                                                        |                                                                    |
|                                           | 9.2 <sup>a</sup>                             | 3.0                   | 0.33                                                           | 6.6               | 0.73                                                       |                                                                        |                                                                    |
|                                           |                                              | 6.8                   | 0.30                                                           | 15.2              | 0.67                                                       |                                                                        |                                                                    |
|                                           |                                              | 9.1                   | 0.29                                                           | 20.2              | 0.64                                                       |                                                                        |                                                                    |
| 335                                       | 9.0 <sup>a</sup>                             | 3.0                   | 0.33                                                           | 6.1               | 0.66                                                       | 0.31 ± 0.02                                                            | 0.63 ± 0.04                                                        |
|                                           |                                              | 8.0                   | 0.29                                                           | 16.1              | 0.58                                                       |                                                                        |                                                                    |
|                                           |                                              | 10.6                  | 0.29                                                           | 21.2              | 0.58                                                       |                                                                        |                                                                    |
|                                           | 9.2 <sup>b</sup>                             | 3.1                   | 0.34                                                           | 6.1               | 0.68                                                       |                                                                        |                                                                    |
|                                           |                                              | 8.3                   | 0.31                                                           | 16.6              | 0.61                                                       |                                                                        |                                                                    |
|                                           |                                              | 10.8                  | 0.30                                                           | 21.7              | 0.60                                                       |                                                                        |                                                                    |
|                                           | 9.2 <sup>a</sup>                             | 3.2                   | 0.35                                                           | 6.3               | 0.70                                                       |                                                                        |                                                                    |
|                                           |                                              | 7.2                   | 0.32                                                           | 14.4              | 0.64                                                       |                                                                        |                                                                    |
|                                           |                                              | 9.5                   | 0.30                                                           | 19.1              | 0.60                                                       |                                                                        |                                                                    |
| 340                                       | 9.0 <sup>a</sup>                             | 3.2                   | 0.35                                                           | 6.1               | 0.66                                                       | 0.34 ± 0.03                                                            | 0.65 ± 0.05                                                        |
|                                           |                                              | 8.7                   | 0.32                                                           | 16.4              | 0.60                                                       |                                                                        |                                                                    |
|                                           |                                              | 11.4                  | 0.31                                                           | 21.6              | 0.59                                                       |                                                                        |                                                                    |
|                                           | 9.2 <sup>b</sup>                             | 3.6                   | 0.40                                                           | 6.7               | 0.49                                                       |                                                                        |                                                                    |
|                                           |                                              | 8.9                   | 0.33                                                           | 16.9              | 0.47                                                       |                                                                        |                                                                    |
|                                           |                                              | 11.7                  | 0.33                                                           | 22.2              | 0.48                                                       |                                                                        |                                                                    |
|                                           | 9.2 <sup>a</sup>                             | 3.4                   | 0.38                                                           | 6.4               | 0.52                                                       |                                                                        |                                                                    |
|                                           |                                              | 7.6                   | 0.34                                                           | 14.5              | 0.40                                                       |                                                                        |                                                                    |
|                                           |                                              | 10.2                  | 0.33                                                           | 19.4              | 0.48                                                       |                                                                        |                                                                    |
| <b>Average</b>                            |                                              |                       |                                                                |                   |                                                            | <b>0.32 ± 0.03</b>                                                     | <b>0.65 ± 0.05</b>                                                 |

**Table S8.** *trans*-to-*cis* photoisomerization quantum yields at 334 nm irradiation for *fac*-[Re(CO)<sub>3</sub>(dmcb)(*trans*-stpyCN)]<sup>+</sup> in CH<sub>3</sub>CN (*I*<sub>0</sub> = 2.61x10<sup>15</sup> quanta s<sup>-1</sup>, Δ*t* = 8 s).

| $\lambda_{\text{monitoring}} / \text{nm}$ | concentration / $10^{-4} \text{ mol L}^{-1}$ | % photolysis apparent | $\Phi_{\text{trans} \rightarrow \text{cis}}^{\text{apparent}}$ | % photolysis true | $\Phi_{\text{trans} \rightarrow \text{cis}}^{\text{true}}$ | $\Phi_{\text{trans} \rightarrow \text{cis}}^{\text{apparent average}}$ | $\Phi_{\text{trans} \rightarrow \text{cis}}^{\text{true average}}$ |             |             |             |
|-------------------------------------------|----------------------------------------------|-----------------------|----------------------------------------------------------------|-------------------|------------------------------------------------------------|------------------------------------------------------------------------|--------------------------------------------------------------------|-------------|-------------|-------------|
| 330                                       | 9.5                                          | 3.8                   | 0.31                                                           | 8.4               | 0.69                                                       | 0.29 ± 0.03                                                            | 0.64 ± 0.06                                                        |             |             |             |
|                                           |                                              | 7.1                   | 0.30                                                           | 15.9              | 0.66                                                       |                                                                        |                                                                    |             |             |             |
|                                           |                                              | 10.5                  | 0.29                                                           | 23.4              | 0.64                                                       |                                                                        |                                                                    |             |             |             |
|                                           | 9.6                                          | 3.7                   | 0.31                                                           | 8.3               | 0.69                                                       |                                                                        |                                                                    |             |             |             |
|                                           |                                              | 7.2                   | 0.30                                                           | 16.0              | 0.66                                                       |                                                                        |                                                                    |             |             |             |
|                                           |                                              | 10.5                  | 0.29                                                           | 23.3              | 0.65                                                       |                                                                        |                                                                    |             |             |             |
|                                           | 335                                          | 9.5                   | 2.8                                                            | 0.23              | 6.2                                                        |                                                                        |                                                                    | 0.51        | 0.32 ± 0.01 | 0.64 ± 0.02 |
|                                           |                                              |                       | 6.4                                                            | 0.26              | 14.2                                                       |                                                                        |                                                                    | 0.58        |             |             |
|                                           |                                              |                       | 10.5                                                           | 0.29              | 23.4                                                       |                                                                        |                                                                    | 0.64        |             |             |
| 9.6                                       |                                              | 4.0                   | 0.33                                                           | 7.9               | 0.66                                                       |                                                                        |                                                                    |             |             |             |
|                                           |                                              | 7.5                   | 0.31                                                           | 15.1              | 0.63                                                       |                                                                        |                                                                    |             |             |             |
|                                           |                                              | 11.1                  | 0.31                                                           | 22.2              | 0.61                                                       |                                                                        |                                                                    |             |             |             |
| 340                                       |                                              | 9.5                   | 4.0                                                            | 0.33              | 8.0                                                        | 0.66                                                                   | 0.34 ± 0.01                                                        | 0.65 ± 0.02 |             |             |
|                                           |                                              |                       | 7.6                                                            | 0.31              | 15.2                                                       | 0.63                                                                   |                                                                    |             |             |             |
|                                           |                                              |                       | 11.1                                                           | 0.31              | 22.3                                                       | 0.61                                                                   |                                                                    |             |             |             |
|                                           | 9.6                                          | 4.0                   | 0.33                                                           | 7.9               | 0.66                                                       |                                                                        |                                                                    |             |             |             |
|                                           |                                              | 7.5                   | 0.31                                                           | 15.1              | 0.63                                                       |                                                                        |                                                                    |             |             |             |
|                                           |                                              | 11.1                  | 0.31                                                           | 22.2              | 0.61                                                       |                                                                        |                                                                    |             |             |             |
|                                           | Average                                      | 9.5                   | 4.3                                                            | 0.36              | 8.2                                                        | 0.68                                                                   |                                                                    |             | 0.32 ± 0.03 | 0.64 ± 0.04 |
|                                           |                                              |                       | 8.3                                                            | 0.34              | 16.0                                                       | 0.65                                                                   |                                                                    |             |             |             |
|                                           |                                              |                       | 12.1                                                           | 0.33              | 23.0                                                       | 0.63                                                                   |                                                                    |             |             |             |
| 9.6                                       |                                              | 4.2                   | 0.35                                                           | 8.0               | 0.67                                                       |                                                                        |                                                                    |             |             |             |
|                                           |                                              | 8.1                   | 0.34                                                           | 15.4              | 0.64                                                       |                                                                        |                                                                    |             |             |             |
|                                           |                                              | 12.0                  | 0.33                                                           | 22.7              | 0.63                                                       |                                                                        |                                                                    |             |             |             |
| 9.5                                       |                                              | 4.2                   | 0.35                                                           | 8.0               | 0.66                                                       |                                                                        |                                                                    |             |             |             |
|                                           |                                              | 8.1                   | 0.34                                                           | 15.4              | 0.64                                                       |                                                                        |                                                                    |             |             |             |
|                                           |                                              | 12.7                  | 0.35                                                           | 24.0              | 0.66                                                       |                                                                        |                                                                    |             |             |             |

**Table S9.** *trans*-to-*cis* photoisomerization quantum yields at 365 nm irradiation for *fac*-[Re(CO)<sub>3</sub>(dmcb)(*trans*-stpyCN)]<sup>+</sup> in CH<sub>3</sub>CN (*I*<sub>0</sub> = 2.61x10<sup>15</sup> quanta s<sup>-1</sup>, <sup>a</sup>Δ*t* = 20 s, <sup>b</sup>Δ*t* = 40 s).

| $\lambda_{\text{monitoring}} / \text{nm}$ | concentration/<br>10 <sup>-4</sup> mol L <sup>-1</sup> | % photolysis<br>apparent | $\Phi_{\text{trans} \rightarrow \text{cis}}^{\text{apparent}}$ | % photolysis<br>true | $\Phi_{\text{trans} \rightarrow \text{cis}}^{\text{true}}$ | $\Phi_{\text{trans} \rightarrow \text{cis}}^{\text{apparent average}}$ | $\Phi_{\text{trans} \rightarrow \text{cis}}^{\text{true average}}$ |
|-------------------------------------------|--------------------------------------------------------|--------------------------|----------------------------------------------------------------|----------------------|------------------------------------------------------------|------------------------------------------------------------------------|--------------------------------------------------------------------|
| 330                                       | 3.2 <sup>a</sup>                                       | 2.7                      | 0.30                                                           | 6.1                  | 0.68                                                       | 0.28 ± 0.03                                                            | 0.62 ± 0.06                                                        |
|                                           |                                                        | 5.0                      | 0.28                                                           | 11.0                 | 0.62                                                       |                                                                        |                                                                    |
|                                           |                                                        | 8.8                      | 0.25                                                           | 19.6                 | 0.55                                                       |                                                                        |                                                                    |
|                                           | 3.4 <sup>a</sup>                                       | 2.5                      | 0.30                                                           | 5.7                  | 0.67                                                       |                                                                        |                                                                    |
|                                           |                                                        | 5.0                      | 0.29                                                           | 11.1                 | 0.65                                                       |                                                                        |                                                                    |
|                                           |                                                        | 8.7                      | 0.26                                                           | 19.5                 | 0.57                                                       |                                                                        |                                                                    |
|                                           | 3.4 <sup>b</sup>                                       | 2.6                      | 0.30                                                           | 5.7                  | 0.68                                                       |                                                                        |                                                                    |
|                                           |                                                        | 4.8                      | 0.28                                                           | 10.7                 | 0.63                                                       |                                                                        |                                                                    |
|                                           |                                                        | 7.9                      | 0.24                                                           | 17.7                 | 0.52                                                       |                                                                        |                                                                    |
| 335                                       | 3.2 <sup>a</sup>                                       | 3.0                      | 0.34                                                           | 6.1                  | 0.68                                                       | 0.31 ± 0.03                                                            | 0.62 ± 0.06                                                        |
|                                           |                                                        | 5.5                      | 0.31                                                           | 11.0                 | 0.61                                                       |                                                                        |                                                                    |
|                                           |                                                        | 10.0                     | 0.28                                                           | 20.1                 | 0.56                                                       |                                                                        |                                                                    |
|                                           | 3.4 <sup>a</sup>                                       | 2.9                      | 0.34                                                           | 5.8                  | 0.68                                                       |                                                                        |                                                                    |
|                                           |                                                        | 5.1                      | 0.30                                                           | 10.3                 | 0.61                                                       |                                                                        |                                                                    |
|                                           |                                                        | 9.2                      | 0.27                                                           | 18.5                 | 0.55                                                       |                                                                        |                                                                    |
|                                           | 3.4 <sup>b</sup>                                       | 2.9                      | 0.34                                                           | 5.8                  | 0.68                                                       |                                                                        |                                                                    |
|                                           |                                                        | 5.5                      | 0.32                                                           | 10.9                 | 0.65                                                       |                                                                        |                                                                    |
|                                           |                                                        | 9.4                      | 0.28                                                           | 18.8                 | 0.55                                                       |                                                                        |                                                                    |
| 340                                       | 3.2 <sup>a</sup>                                       | 3.2                      | 0.36                                                           | 6.1                  | 0.69                                                       | 0.33 ± 0.03                                                            | 0.63 ± 0.05                                                        |
|                                           |                                                        | 6.1                      | 0.34                                                           | 11.5                 | 0.64                                                       |                                                                        |                                                                    |
|                                           |                                                        | 10.6                     | 0.29                                                           | 20.0                 | 0.56                                                       |                                                                        |                                                                    |
|                                           | 3.4 <sup>a</sup>                                       | 3.1                      | 0.37                                                           | 5.9                  | 0.70                                                       |                                                                        |                                                                    |
|                                           |                                                        | 5.8                      | 0.34                                                           | 10.9                 | 0.65                                                       |                                                                        |                                                                    |
|                                           |                                                        | 10.1                     | 0.30                                                           | 19.1                 | 0.57                                                       |                                                                        |                                                                    |
|                                           | 3.4 <sup>b</sup>                                       | 3.0                      | 0.36                                                           | 5.7                  | 0.67                                                       |                                                                        |                                                                    |
|                                           |                                                        | 5.6                      | 0.33                                                           | 10.6                 | 0.63                                                       |                                                                        |                                                                    |
|                                           |                                                        | 10.3                     | 0.30                                                           | 19.4                 | 0.58                                                       |                                                                        |                                                                    |
| <b>Average</b>                            |                                                        |                          |                                                                |                      |                                                            | <b>0.31 ± 0.03</b>                                                     | <b>0.62 ± 0.05</b>                                                 |



**Table S10.** *trans*-to-*cis* photoisomerization quantum yields at 404 nm irradiation for *fac*-[Re(CO)<sub>3</sub>(dmcb)(*trans*-stpyCN)]<sup>+</sup> in CH<sub>3</sub>CN (*I*<sub>0</sub> = 5.3x10<sup>15</sup> quanta s<sup>-1</sup>, Δ*t* = 20 s).

| $\lambda_{\text{monitoring}} / \text{nm}$ | concentration / $10^{-4} \text{ mol L}^{-1}$ | % photolysis apparent | $\Phi_{\text{trans} \rightarrow \text{cis}}^{\text{apparent}}$ | % photolysis true | $\Phi_{\text{trans} \rightarrow \text{cis}}^{\text{true}}$ | $\Phi_{\text{trans} \rightarrow \text{cis}}^{\text{apparent average}}$ | $\Phi_{\text{trans} \rightarrow \text{cis}}^{\text{true average}}$ |
|-------------------------------------------|----------------------------------------------|-----------------------|----------------------------------------------------------------|-------------------|------------------------------------------------------------|------------------------------------------------------------------------|--------------------------------------------------------------------|
| 330                                       | 8.1                                          | 3.9                   | 0.29                                                           | 8.7               | 0.66                                                       | 0.26 ± 0.02                                                            | 0.58 ± 0.04                                                        |
|                                           |                                              | 7.5                   | 0.28                                                           | 16.7              | 0.63                                                       |                                                                        |                                                                    |
|                                           |                                              | 10.3                  | 0.26                                                           | 23.0              | 0.58                                                       |                                                                        |                                                                    |
|                                           | 8.2                                          | 3.4                   | 0.26                                                           | 7.5               | 0.57                                                       |                                                                        |                                                                    |
|                                           |                                              | 6.7                   | 0.25                                                           | 14.8              | 0.56                                                       |                                                                        |                                                                    |
|                                           |                                              | 9.8                   | 0.25                                                           | 21.9              | 0.56                                                       |                                                                        |                                                                    |
|                                           | 8.2                                          | 3.4                   | 0.26                                                           | 7.5               | 0.57                                                       |                                                                        |                                                                    |
|                                           |                                              | 6.6                   | 0.25                                                           | 14.7              | 0.56                                                       |                                                                        |                                                                    |
|                                           |                                              | 9.3                   | 0.24                                                           | 20.7              | 0.53                                                       |                                                                        |                                                                    |
| 335                                       | 8.1                                          | 3.9                   | 0.29                                                           | 7.7               | 0.58                                                       | 0.27 ± 0.02                                                            | 0.53 ± 0.05                                                        |
|                                           |                                              | 7.6                   | 0.28                                                           | 15.1              | 0.57                                                       |                                                                        |                                                                    |
|                                           |                                              | 10.4                  | 0.26                                                           | 20.9              | 0.53                                                       |                                                                        |                                                                    |
|                                           | 8.2                                          | 3.8                   | 0.29                                                           | 7.6               | 0.58                                                       |                                                                        |                                                                    |
|                                           |                                              | 7.5                   | 0.29                                                           | 15.1              | 0.57                                                       |                                                                        |                                                                    |
|                                           |                                              | 10.0                  | 0.25                                                           | 20.0              | 0.51                                                       |                                                                        |                                                                    |
|                                           | 8.2                                          | 3.3                   | 0.25                                                           | 6.7               | 0.51                                                       |                                                                        |                                                                    |
|                                           |                                              | 6.3                   | 0.24                                                           | 12.7              | 0.48                                                       |                                                                        |                                                                    |
|                                           |                                              | 9.1                   | 0.23                                                           | 18.3              | 0.46                                                       |                                                                        |                                                                    |
| 340                                       | 8.1                                          | 4.2                   | 0.32                                                           | 8.0               | 0.60                                                       | 0.28 ± 0.03                                                            | 0.52 ± 0.05                                                        |
|                                           |                                              | 7.6                   | 0.29                                                           | 14.56             | 0.55                                                       |                                                                        |                                                                    |
|                                           |                                              | 10.9                  | 0.27                                                           | 20.6              | 0.52                                                       |                                                                        |                                                                    |
|                                           | 8.2                                          | 4.0                   | 0.30                                                           | 7.5               | 0.57                                                       |                                                                        |                                                                    |
|                                           |                                              | 7.7                   | 0.29                                                           | 14.5              | 0.55                                                       |                                                                        |                                                                    |
|                                           |                                              | 10.5                  | 0.27                                                           | 19.9              | 0.50                                                       |                                                                        |                                                                    |
|                                           | 8.2                                          | 3.5                   | 0.26                                                           | 6.6               | 0.50                                                       |                                                                        |                                                                    |
|                                           |                                              | 6.2                   | 0.23                                                           | 11.7              | 0.45                                                       |                                                                        |                                                                    |
|                                           |                                              | 9.6                   | 0.24                                                           | 18.2              | 0.46                                                       |                                                                        |                                                                    |
| <b>Average</b>                            |                                              |                       |                                                                |                   |                                                            | <b>0.27 ± 0.02</b>                                                     | <b>0.55 ± 0.05</b>                                                 |

**Table S11.** *trans*-to-*cis* photoisomerization quantum yields at 436 nm irradiation for *fac*-[Re(CO)<sub>3</sub>(dmcB)(*trans*-stpyCN)]<sup>+</sup> in CH<sub>3</sub>CN (*I*<sub>0</sub> = 2.71x10<sup>16</sup> quanta s<sup>-1</sup>, <sup>a</sup>Δ*t* = 4 s, <sup>b</sup>Δ*t* = 3 s).

| $\lambda_{\text{monitoring}} / \text{nm}$ | concentration/<br>10 <sup>-4</sup> mol L <sup>-1</sup> | % photolysis<br>apparent | $\Phi_{\text{trans} \rightarrow \text{cis}}^{\text{apparent}}$ | % photolysis<br>true | $\Phi_{\text{trans} \rightarrow \text{cis}}^{\text{true}}$ | $\Phi_{\text{trans} \rightarrow \text{cis}}^{\text{apparent average}}$ | $\Phi_{\text{trans} \rightarrow \text{cis}}^{\text{true average}}$ |
|-------------------------------------------|--------------------------------------------------------|--------------------------|----------------------------------------------------------------|----------------------|------------------------------------------------------------|------------------------------------------------------------------------|--------------------------------------------------------------------|
| 330                                       | 3.5 <sup>a</sup>                                       | 3.9                      | 0.27                                                           | 8.7                  | 0.61                                                       | 0.26 ± 0.02                                                            | 0.58 ± 0.05                                                        |
|                                           |                                                        | 7.5                      | 0.26                                                           | 16.7                 | 0.58                                                       |                                                                        |                                                                    |
|                                           |                                                        | 9.9                      | 0.25                                                           | 22.0                 | 0.56                                                       |                                                                        |                                                                    |
|                                           | 3.5 <sup>a</sup>                                       | 3.6                      | 0.25                                                           | 8.1                  | 0.56                                                       |                                                                        |                                                                    |
|                                           |                                                        | 7.0                      | 0.24                                                           | 15.5                 | 0.54                                                       |                                                                        |                                                                    |
|                                           |                                                        | 9.4                      | 0.24                                                           | 21.0                 | 0.53                                                       |                                                                        |                                                                    |
|                                           | 3.5 <sup>b</sup>                                       | 4.5                      | 0.31                                                           | 9.9                  | 0.70                                                       |                                                                        |                                                                    |
|                                           |                                                        | 7.7                      | 0.27                                                           | 17.1                 | 0.60                                                       |                                                                        |                                                                    |
|                                           |                                                        | 10.0                     | 0.26                                                           | 22.2                 | 0.57                                                       |                                                                        |                                                                    |
| 335                                       | 3.5 <sup>a</sup>                                       | 4.4                      | 0.30                                                           | 8.8                  | 0.61                                                       | 0.28 ± 0.02                                                            | 0.56 ± 0.04                                                        |
|                                           |                                                        | 8.1                      | 0.28                                                           | 16.3                 | 0.57                                                       |                                                                        |                                                                    |
|                                           |                                                        | 10.6                     | 0.27                                                           | 21.3                 | 0.54                                                       |                                                                        |                                                                    |
|                                           | 3.5 <sup>a</sup>                                       | 3.9                      | 0.27                                                           | 7.9                  | 0.55                                                       |                                                                        |                                                                    |
|                                           |                                                        | 7.4                      | 0.26                                                           | 14.8                 | 0.51                                                       |                                                                        |                                                                    |
|                                           |                                                        | 10.5                     | 0.27                                                           | 21.1                 | 0.53                                                       |                                                                        |                                                                    |
|                                           | 3.5 <sup>b</sup>                                       | 4.4                      | 0.31                                                           | 8.9                  | 0.62                                                       |                                                                        |                                                                    |
|                                           |                                                        | 8.0                      | 0.28                                                           | 15.9                 | 0.56                                                       |                                                                        |                                                                    |
|                                           |                                                        | 10.3                     | 0.26                                                           | 20.7                 | 0.53                                                       |                                                                        |                                                                    |
| 340                                       | 3.5 <sup>a</sup>                                       | 4.2                      | 0.29                                                           | 8.0                  | 0.56                                                       | 0.29 ± 0.01                                                            | 0.54 ± 0.02                                                        |
|                                           |                                                        | 8.5                      | 0.30                                                           | 16.2                 | 0.57                                                       |                                                                        |                                                                    |
|                                           |                                                        | 11.1                     | 0.28                                                           | 21.0                 | 0.53                                                       |                                                                        |                                                                    |
|                                           | 3.5 <sup>a</sup>                                       | 4.2                      | 0.29                                                           | 7.9                  | 0.55                                                       |                                                                        |                                                                    |
|                                           |                                                        | 7.8                      | 0.27                                                           | 14.9                 | 0.52                                                       |                                                                        |                                                                    |
|                                           |                                                        | 10.4                     | 0.27                                                           | 19.7                 | 0.50                                                       |                                                                        |                                                                    |
|                                           | 3.5 <sup>b</sup>                                       | 4.3                      | 0.30                                                           | 8.2                  | 0.58                                                       |                                                                        |                                                                    |
|                                           |                                                        | 8.1                      | 0.28                                                           | 15.4                 | 0.54                                                       |                                                                        |                                                                    |
|                                           |                                                        | 10.8                     | 0.28                                                           | 20.4                 | 0.52                                                       |                                                                        |                                                                    |
| <b>Average</b>                            |                                                        |                          |                                                                |                      |                                                            | <b>0.28 ± 0.01</b>                                                     | <b>0.56 ± 0.04</b>                                                 |

**Table S12.** *cis*-to-*trans* photoisomerization quantum yields at 255 nm irradiation for *fac*-[Re(CO)<sub>3</sub>(dmcb)(*cis*-stpy)]<sup>+</sup> in CH<sub>3</sub>CN (*I*<sub>0</sub> = 1.86x10<sup>15</sup> quanta s<sup>-1</sup>, Δ*t* = 20 s).

| $\lambda_{\text{monitoring}} / \text{nm}$ | concentration/ 10 <sup>-4</sup> mol L <sup>-1</sup> | % photolysis true | $\Phi_{\text{trans} \rightarrow \text{cis}}^{\text{true}}$ | $\Phi_{\text{trans} \rightarrow \text{cis}}^{\text{true average}}$ |
|-------------------------------------------|-----------------------------------------------------|-------------------|------------------------------------------------------------|--------------------------------------------------------------------|
| 330                                       | 2.2                                                 | 4.9               | 0.18                                                       | 0.18 ± 0.03                                                        |
|                                           |                                                     | 11.5              | 0.21                                                       |                                                                    |
|                                           |                                                     | 16.8              | 0.21                                                       |                                                                    |
|                                           | 2.2                                                 | 4.3               | 0.14                                                       |                                                                    |
|                                           |                                                     | 9.7               | 0.16                                                       |                                                                    |
|                                           |                                                     | 14.7              | 0.16                                                       |                                                                    |
|                                           | 2.2                                                 | 6.3               | 0.19                                                       |                                                                    |
|                                           |                                                     | 12.4              | 0.19                                                       |                                                                    |
|                                           |                                                     | 18.1              | 0.18                                                       |                                                                    |
| 335                                       | 2.2                                                 | 4.8               | 0.18                                                       | 0.17 ± 0.02                                                        |
|                                           |                                                     | 9.9               | 0.19                                                       |                                                                    |
|                                           |                                                     | 15.0              | 0.19                                                       |                                                                    |
|                                           | 2.2                                                 | 4.4               | 0.15                                                       |                                                                    |
|                                           |                                                     | 9.1               | 0.15                                                       |                                                                    |
|                                           |                                                     | 14.2              | 0.16                                                       |                                                                    |
|                                           | 2.2                                                 | 4.9               | 0.15                                                       |                                                                    |
|                                           |                                                     | 12.1              | 0.19                                                       |                                                                    |
|                                           |                                                     | 18.1              | 0.19                                                       |                                                                    |
| 340                                       | 2.2                                                 | 3.2               | 0.19                                                       | 0.18 ± 0.02                                                        |
|                                           |                                                     | 6.8               | 0.20                                                       |                                                                    |
|                                           |                                                     | 9.9               | 0.19                                                       |                                                                    |
|                                           | 2.2                                                 | 3.1               | 0.17                                                       |                                                                    |
|                                           |                                                     | 5.8               | 0.16                                                       |                                                                    |
|                                           |                                                     | 8.6               | 0.15                                                       |                                                                    |
|                                           | 2.2                                                 | 3.5               | 0.18                                                       |                                                                    |
|                                           |                                                     | 7.1               | 0.19                                                       |                                                                    |
|                                           |                                                     | 11.0              | 0.19                                                       |                                                                    |
| <b>Average</b>                            |                                                     |                   |                                                            | <b>0.18 ± 0.02</b>                                                 |

**Table S13.** *cis*-to-*trans* photoisomerization quantum yields at 255 nm irradiation for *fac*-[Re(CO)<sub>3</sub>(dmcb)(*cis*-stpyCN)]<sup>+</sup> in CH<sub>3</sub>CN (*I*<sub>0</sub> = 1.86x10<sup>15</sup> quanta s<sup>-1</sup>, Δ*t* = 10 s).

| $\lambda_{\text{monitoring}} / \text{nm}$ | concentration/ 10 <sup>-4</sup> mol L <sup>-1</sup> | % photolysis true | $\Phi_{\text{trans} \rightarrow \text{cis}}^{\text{true}}$ | $\Phi_{\text{trans} \rightarrow \text{cis}}^{\text{true average}}$ |
|-------------------------------------------|-----------------------------------------------------|-------------------|------------------------------------------------------------|--------------------------------------------------------------------|
| 330                                       | 1.2                                                 | 1.1               | 0.23                                                       | 0.27 ± 0.02                                                        |
|                                           |                                                     | 2.5               | 0.27                                                       |                                                                    |
|                                           |                                                     | 3.8               | 0.28                                                       |                                                                    |
|                                           | 1.2                                                 | 1.1               | 0.24                                                       |                                                                    |
|                                           |                                                     | 2.6               | 0.28                                                       |                                                                    |
|                                           |                                                     | 3.8               | 0.28                                                       |                                                                    |
|                                           | 1.2                                                 | 1.2               | 0.26                                                       |                                                                    |
|                                           |                                                     | 2.9               | 0.31                                                       |                                                                    |
|                                           |                                                     | 3.9               | 0.28                                                       |                                                                    |
| 335                                       | 1.2                                                 | 1.0               | 0.20                                                       | 0.25 ± 0.03                                                        |
|                                           |                                                     | 2.3               | 0.24                                                       |                                                                    |
|                                           |                                                     | 3.6               | 0.25                                                       |                                                                    |
|                                           | 1.2                                                 | 1.3               | 0.25                                                       |                                                                    |
|                                           |                                                     | 2.5               | 0.26                                                       |                                                                    |
|                                           |                                                     | 3.7               | 0.25                                                       |                                                                    |
|                                           | 1.2                                                 | 1.3               | 0.27                                                       |                                                                    |
|                                           |                                                     | 2.8               | 0.28                                                       |                                                                    |
|                                           |                                                     | 4.1               | 0.28                                                       |                                                                    |
| 340                                       | 1.2                                                 | 0.9               | 0.22                                                       | 0.26 ± 0.02                                                        |
|                                           |                                                     | 2.0               | 0.25                                                       |                                                                    |
|                                           |                                                     | 3.1               | 0.25                                                       |                                                                    |
|                                           | 1.2                                                 | 1.0               | 0.26                                                       |                                                                    |
|                                           |                                                     | 2.1               | 0.25                                                       |                                                                    |
|                                           |                                                     | 3.2               | 0.26                                                       |                                                                    |
|                                           | 1.2                                                 | 1.1               | 0.28                                                       |                                                                    |
|                                           |                                                     | 2.3               | 0.29                                                       |                                                                    |
|                                           |                                                     | 3.4               | 0.28                                                       |                                                                    |
|                                           |                                                     |                   | <b>Average</b>                                             | <b>0.26</b> <b>0.02</b>                                            |

### 3. References

- 1 A. S. Polo, M. K. Itokazu and N. Y. Murakami Iha, *J. Photochem. Photobiol. A Chem.*, 2006, **181**, 73–78.
- 2 K. P. M. Frin and N. Y. Murakami Iha, *Inorganica Chim. Acta*, 2011, **376**, 531–537.
- 3 M. K. Itokazu, A. Sarto Polo and N. Y. Murakami Iha, *J. Photochem. Photobiol. A Chem.*, 2003, **160**, 27–32.
- 4 K. P. M. Frin, M. K. Itokazu and N. Y. Murakami Iha, *Inorganica Chim. Acta*, 2010, **363**, 294–300.
- 5 A. S. Polo, M. K. Itokazu, K. P. M. Frin, A. O. T. Patrocínio and N. Y. Murakami Iha, *Coord. Chem. Rev.*, 2006, **250**, 1669–1680.
- 6 A. O. T. Patrocínio and N. Y. Murakami Iha, *Inorg. Chem.*, 2008, **47**, 10851–10857.
- 7 K. M. Frin and N. Y. Murakami Iha, *J. Braz. Chem. Soc.*, 2006, **17**, 1664–1671.
- 8 M. K. Itokazu, A. S. Polo and N. Y. Murakami Iha, *Int. J. Photoenergy*, 2001, **3**, 143–164.
- 9 M. K. Itokazu, A. S. Polo, D. L. A. de Faria, C. A. Bignozzi and N. Y. Murakami Iha, *Inorganica Chim. Acta*, 2001, **313**, 149–155.
- 10 K. P. S. Zanoni and N. Y. Murakami Iha, *Dalton Trans.*, 2017, **46**, 9951–9958.
- 11 A. O. T. Patrocínio, M. K. Brennaman, T. J. Meyer and N. Y. Murakami Iha, *J. Phys. Chem. A*, 2010, **114**, 12129–12137.
- 12 K. P. M. Frin, K. P. S. Zanoni and N. Y. Murakami Iha, *Inorg. Chem. Commun.*, 2012, **20**, 105–107.
- 13 A. O. T. Patrocínio, K. P. M. Frin and N. Y. Murakami Iha, *Inorg. Chem.*, 2013, **52**, 5889–5896.
